# Supplementary material for: An interfacial engineering strategy of a VS 2 /CNT 3D conductive network for stable and high-performance zinc-ion batteries
Source: Royal Society of Chemistry journal article supplement (doi:10.1039/d5cc06139c), 2026-01-01
Supplement: d5cc06139c1.pdf [file d5cc06139c1.pdf]

## *Supporting information*

# **An interfacial engineering strategy of VS<sub>2</sub>/CNT 3D conductive network for stable and high-performance zinc-ion battery**

## **Experimental Section**

### **1. Materials preparation**

Different amounts of carbon nanotubes (CNT) were added to the beaker, and 45 ml of deionized water was added. After ultrasonic treatment for two hours, a CNT ultrasonic dispersion solution was obtained. Then, 2 mM (0.234 g) NH<sub>4</sub>VO<sub>3</sub> and 15 mM (1.127 g) C<sub>2</sub>H<sub>5</sub>NS (TAA) were placed in the beaker and stirred at room temperature for 10 minutes. After complete dissolution of NH<sub>4</sub>VO<sub>3</sub>, 2 mL of NH<sub>3</sub>·H<sub>2</sub>O was slowly added to the beaker and stirred at room temperature for 20 minutes to ensure that NH<sub>3</sub>·H<sub>2</sub>O fully participated in the reaction. Then, a 3×3 cm<sup>2</sup> piece of activated carbon cloth was cut as a current collector. The current collector and the solution were transferred to a lined autoclave, and a water heat reaction was carried out at 160 °C for 12 hours. After the reaction was completed, the product was collected, washed with deionized water, centrifuged 3~4 times, then washed with ethanol, centrifuged 2~3 times, and the carbon cloth covered with the materials was collected. It was placed in a 60°C vacuum drying box overnight to obtain the in-situ grown carbon cloth of VS<sub>2</sub>/CNT. For comparison, a current collector carbon cloth without CNT was also prepared.

### **Materials characterization**

The synthesized material was characterized using X-ray powder diffraction (XRD), X-ray photoelectron spectroscopy (XPS), Fourier transform infrared spectroscopy (FT-IR), scanning electron microscopy (SEM), and transmission electron microscopy (TEM).

### **Electrochemical measurements**

Electrochemical evaluation was performed by assembling CR2032-type coin

cells, with zinc foil as the anode and fiberglass filter paper as the separator. The electrolyte consisted of a composite solution containing 80  $\mu\text{L}$  of 2 M  $\text{Zn}(\text{CF}_3\text{SO}_3)_2$  mixed with 2 M LiTFSI. Galvanostatic charge/discharge (GCD) tests were conducted on a Neware battery tester (BTS-4000) within a voltage window of 0~1.0 V versus  $\text{Zn}^{2+}/\text{Zn}$ . The galvanostatic intermittent titration technique (GITT) was carried out by applying a series of 5 minute galvanostatic discharge pulses at a current density of 100  $\text{mA h g}^{-1}$ , followed by a 20 minute relaxation period. Cyclic voltammetry (CV) and electrochemical impedance spectroscopy (EIS) measurements were performed using a CHI760E electrochemical workstation.

### **Detail of calculation:**

#### **(1) Capacitance contribution**

Calculation of the pseudocapacitance and diffusion-controlled contribution. In the CV test, the connection between the peak current  $i$  and the scan rate  $v$  is as follows:

$$i = av^b \quad (1)$$

$$\log(i) = b \times \log(v) + \log\left(\frac{i}{v^b}\right) \quad (2)$$

Where  $a$  and  $b$  are both variable parameters, and the variety of  $b$  values is 0.5 to 1, corresponding to diffusion control process and surface capacitance control process, respectively.

Moreover, the calculation formulas of capacitance control contribution  $k_1v$  and diffusion control contribution  $k_2v^{0.5}$  are as follows:

$$i = k_1v + k_2v^{0.5} \quad (3)$$

#### **(2) Galvanostatic current intermittent titration technique (GITT)**

GITT is used to measure the diffusion coefficient of  $\text{Zn}^{2+}$ . The diffusion coefficient can be obtained according to the following equation:

$$D = \frac{4L^2}{\pi\tau} \left( \frac{\Delta E_s}{\Delta E_\tau} \right)^2 \quad (4)$$

Where  $\tau(\text{s})$  is the constant current pulse time.  $L$  corresponds to  $\text{Zn}^{2+}$  diffusion length, which is equal to thickness of the electrode.  $\Delta E_s$  is the steady-state voltage change caused by current pulse.  $\Delta E_\tau$  is the voltage change during the constant current pulse.



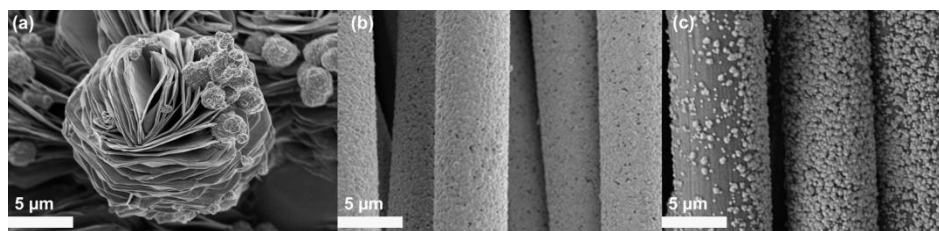

**Figure S1.** SEM images of (a)  $\text{VS}_2$ . (b)  $\text{VS}_2/\text{CNT}-0.01$ . (b)  $\text{VS}_2/\text{CNT}-0.04$ .

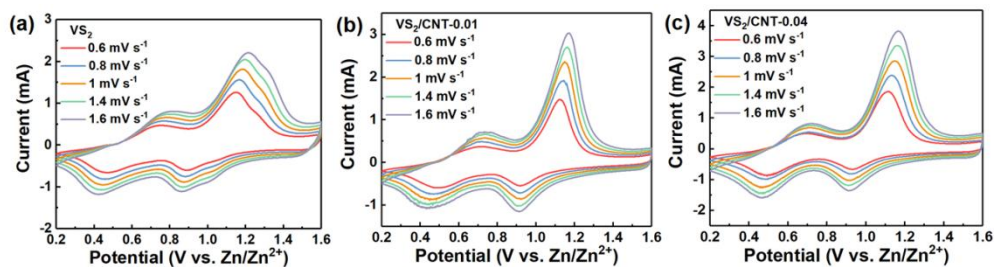

**Figure S2.** CV curves of (a)  $\text{VS}_2$ . (b)  $\text{VS}_2/\text{CNT}-0.01$ . (b)  $\text{VS}_2/\text{CNT}-0.04$ .

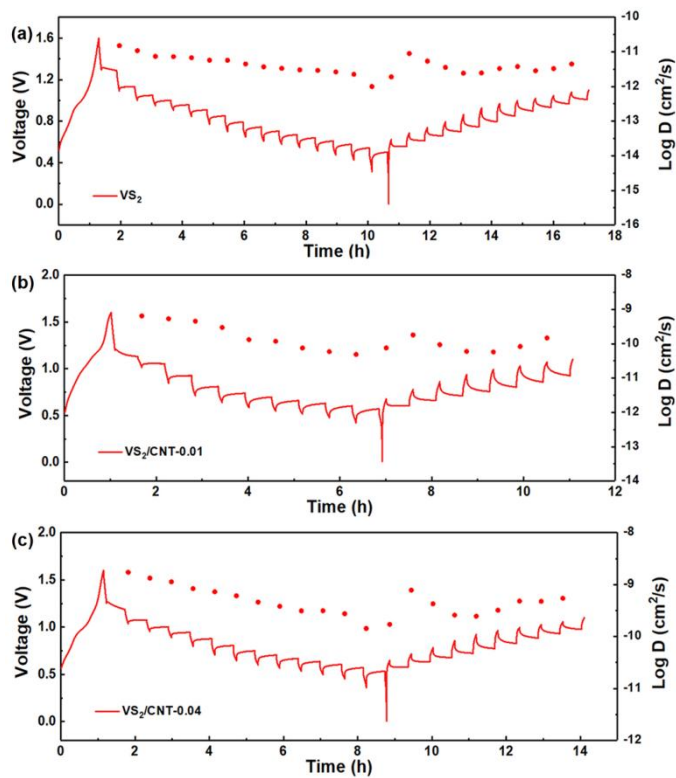

**Figure S3.** GITT curves and corresponding  $\text{Zn}^{2+}$  ion diffusion coefficient of (a)  $\text{VS}_2$ . (b)  $\text{VS}_2/\text{CNT}-0.01$ . (b)  $\text{VS}_2/\text{CNT}-0.04$ .

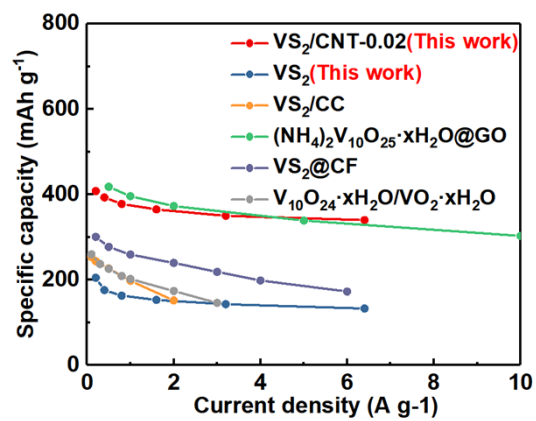

**Figure S4.** Comparison between  $\text{VS}_2$ ,  $\text{VS}_2/\text{CNT-0.02}$  and other materials.

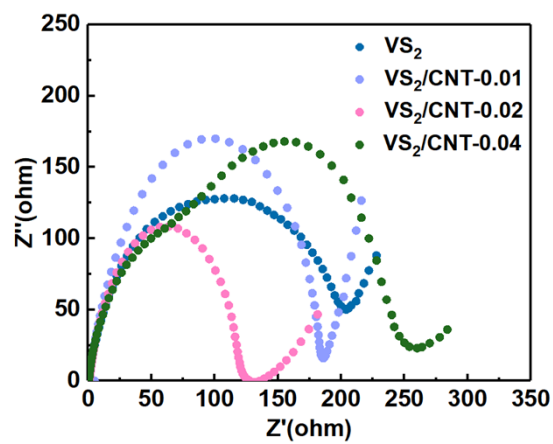

**Figure S5.** EIS of the samples in initial state.
